# Supplementary material
Source: Springer Nature journal article supplement (https://www.springermedizin.de/resource/supplementary/12885_2008_1237_MOESM5_ESM.pdf/9471492)

C T T T T A T T G A A A C A T C A G C A A A G A C A A G A C A G G T A A G T A A C A  
270 280 290 300 310

**Case 89**  
**KRAS p.Ala146Val**

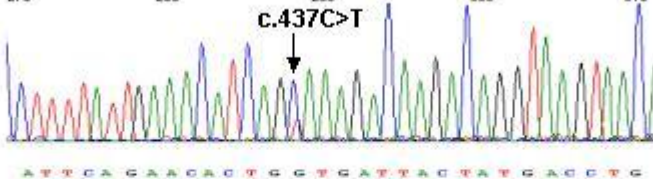

**Case 1**  
**PTPN11 p.Asp61Tyr**

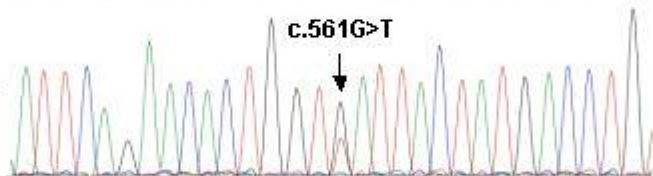

**Case 1**  
**SOS1 p.Leu569Val**

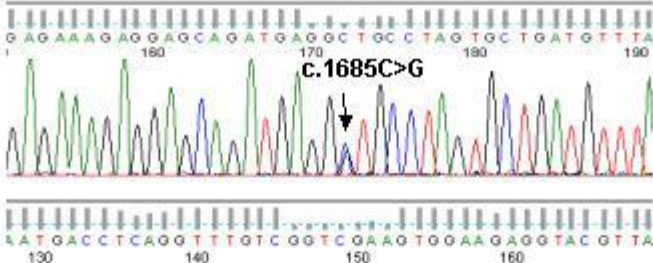

**Case 6**  
**RUNX1 p.Arg166X**

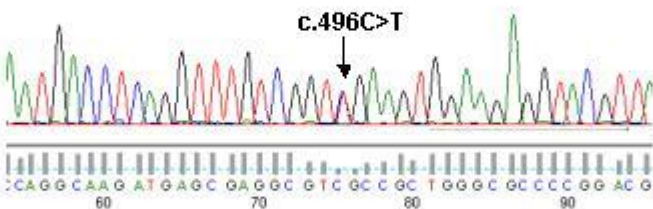

**Case 25**  
**RUNX1 p.Leu56Ser**

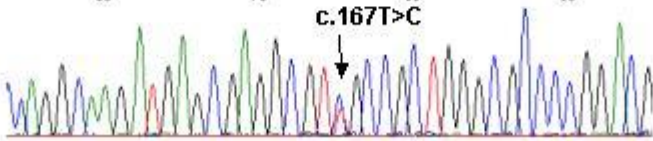

Supplement: MOESM5 [file 9471492]
